# Supplementary material
Source: publisher figshare collection journal article supplement (https://sage.figshare.com/ndownloader/files/16769975)
Supplement: Supplementary file 1 [file 16769975]

**Supplemental Table 4. Neurobehavioral test battery (NBT) outcomes of infant monkeys exposed to vedolizumab *in utero*.**

| Parameter                                      | Group 1         |         | Group 2          |         | Group 3           |         |
|------------------------------------------------|-----------------|---------|------------------|---------|-------------------|---------|
|                                                | Vedolizumab     |         | Vedolizumab      |         | Vedolizumab       |         |
|                                                | 0 mg/kg/day Q2W |         | 10 mg/kg/day Q2W |         | 100 mg/kg/day Q2W |         |
|                                                | PPD 1           | PPD 7   | PPD 1            | PPD 7   | PPD 1             | PPD 7   |
|                                                | N=7             | N=7     | N=7              | N=7     | N=10              | N=10    |
| Respiration rate,<br>mean (SD),<br>breaths/min | 83 (15)         | 96 (20) | 97 (14)          | 99 (11) | 88 (17)           | 92 (11) |
| Observed postural tonus <sup>a,b</sup>         |                 |         |                  |         |                   |         |
| Rt hip abduction,<br>% Grade 2                 | 100             | 100     | 100              | 100     | 100               | 100     |
| Lt hip abduction,<br>% Grade 2                 | 100             | 100     | 100              | 100     | 100               | 100     |
| Rt knee flexed,<br>% Grade 2                   | 100             | 100     | 100              | 100     | 100               | 100     |
| Lt knee flexed,<br>% Grade 2                   | 100             | 100     | 100              | 100     | 100               | 100     |
| Rt toes flexed,<br>% Grade 2                   | 100             | 100     | 100              | 100     | 100               | 100     |
| Lt toes flexed,<br>% Grade 2                   | 100             | 100     | 100              | 100     | 100               | 100     |

|                               |     |     |     |     |     |     |
|-------------------------------|-----|-----|-----|-----|-----|-----|
| Rt shoulder                   |     |     |     |     |     |     |
| abducted,                     | 100 | 100 | 100 | 100 | 100 | 100 |
| % Grade 2                     |     |     |     |     |     |     |
| Lt shoulder                   |     |     |     |     |     |     |
| abducted,                     | 100 | 100 | 100 | 100 | 100 | 100 |
| % Grade 2                     |     |     |     |     |     |     |
| Rt elbow flexed,              |     |     |     |     |     |     |
| % Grade 2                     | 100 | 100 | 100 | 100 | 100 | 100 |
| Lt elbow flexed,              |     |     |     |     |     |     |
| % Grade 2                     | 100 | 100 | 100 | 100 | 100 | 100 |
| Rt finger flexed              |     |     |     |     |     |     |
| % Grade 1                     | 0   | 14  | 0   | 0   | 0   | 0   |
| % Grade 2                     | 86  | 86  | 100 | 100 | 100 | 100 |
| Lt finger flexed,             |     |     |     |     |     |     |
| % Grade 2                     | 100 | 100 | 100 | 100 | 100 | 100 |
| Head extended,                |     |     |     |     |     |     |
| % Grade 2                     | 100 | 100 | 100 | 100 | 100 | 100 |
| Grasp support,                |     |     |     |     |     |     |
| % Grade 2 <sup>c</sup>        | 100 | 100 | 100 | 100 | 100 | 100 |
| Righting reflex, <sup>d</sup> |     |     |     |     |     |     |
| % Grade 1                     | 29  | 0   | 0   | 0   | 0   | 0   |
| % Grade 2                     | 71  | 100 | 100 | 100 | 100 | 100 |

|                                 |     |     |     |     |    |     |
|---------------------------------|-----|-----|-----|-----|----|-----|
| Prone progression, <sup>e</sup> |     |     |     |     |    |     |
| % Grade 1                       | 14  | 0   | 43  | 0   | 40 | 0   |
| % Grade 2                       | 71  | 100 | 57  | 100 | 60 | 100 |
| Buildup (1), <sup>f</sup>       |     |     |     |     |    |     |
| % Grade 1                       | 14  | 71  | 29  | 29  | 40 | 30  |
| % Grade 2                       | 0   | 0   | 0   | 14  | 0  | 40  |
| % Grade 3                       | 0   | 0   | 0   | 0   | 0  | 0   |
| Following of eyes, <sup>g</sup> |     |     |     |     |    |     |
| % Grade 1                       | 14  | 14  | 14  | 29  | 20 | 40  |
| % Grade 2                       | 14  | 29  | 57  | 14  | 30 | 50  |
| Lipsmack orient, <sup>h</sup>   |     |     |     |     |    |     |
| % Grade 1                       | 0   | 0   | 0   | 0   | 10 | 10  |
| % Grade 2                       | 100 | 86  | 100 | 100 | 90 | 90  |
| Sucking, <sup>i</sup>           |     |     |     |     |    |     |
| % Grade 1                       | 43  | 43  | 29  | 43  | 33 | 70  |
| % Grade 2                       | 43  | 29  | 71  | 0   | 67 | 30  |
| Rooting, <sup>j</sup>           |     |     |     |     |    |     |
| % Grade 1                       | 14  | 0   | 0   | 29  | 20 | 10  |
| % Grade 2                       | 29  | 0   | 43  | 0   | 40 | 60  |
| Snout reflex, <sup>k</sup>      |     |     |     |     |    |     |
| % Grade 1                       | 14  | 14  | 14  | 0   | 0  | 10  |
| % Grade 2                       | 57  | 0   | 43  | 14  | 80 | 60  |

|                           |     |     |     |     |     |     |
|---------------------------|-----|-----|-----|-----|-----|-----|
| Nystagmus, <sup>i</sup>   |     |     |     |     |     |     |
| % Grade 2                 | 100 | 100 | 100 | 100 | 100 | 100 |
| Moro reflex, <sup>m</sup> |     |     |     |     |     |     |
| % Grade 1                 | 0   | 0   | 0   | 0   | 10  | 0   |
| % Grade 2                 | 100 | 100 | 100 | 86  | 90  | 100 |
| Buildup (2), <sup>n</sup> |     |     |     |     |     |     |
| % Grade 1                 | 57  | 71  | 14  | 43  | 40  | 70  |
| % Grade 2                 | 14  | 14  | 29  | 29  | 10  | 20  |
| % Grade 3                 | 0   | 0   | 0   | 0   | 0   | 0   |

Lt, left; PPD, postpartum day; Rt, right.

<sup>a</sup> Data shown are observed responses; identical results were obtained for elicited responses.

<sup>b</sup> Postural tonus (observed): Grade 1 = joints bent at least 90 degrees; Grade 2 = joints bent so that sides touch.

<sup>c</sup> Grasp support: Grade 1 = grasps but releases when dowel is pulled away; Grade 2 = supports body weight on the dowel when it is pulled up.

<sup>d</sup> Righting reflex: Grade 1 = rights after five seconds, does not pull all limbs free; Grade 2 = rights immediately and pulls all limbs free.

<sup>e</sup> Prone progression: Grade 1 = crawls on ventrum, tummy touches table; Grade 2 = stands and walks forward.

<sup>f</sup> Buildup (1): Grade 1 = increased activity, struggles, vocalizations; Grade 2 = agitated, scream, vocalizations; Grade 3 = very agitated with spontaneous whole-body startle.

<sup>g</sup> Following of eyes: Grade 1 = follows, but breaks eye contact; Grade 2 = follows fluidly from one side to another.

<sup>h</sup> Lipsmack orient: Grade 1 = one side only, or very slow; Grade 2 = both sides and quickly.

<sup>i</sup> Sucking: Grade 1 = mouthing or biting; Grade 2 = sucking.

<sup>j</sup> Rooting: Grade 1 = partial, weak, or delayed; Grade 2 = complete, rapid, and strong.

<sup>k</sup> Snout reflex: Grade 1 = partial, weak, or delayed; Grade 2 = complete, rapid, and strong.

<sup>l</sup> Nystagmus: Grade 1 = partial, weak, or delayed; Grade 2 = complete, rapid, and strong.

<sup>m</sup> Moro reflex: Grade 1 = partial or weak response; Grade 2 = animal shows full extension and rapid flexion.

<sup>n</sup> Buildup (2): Grade 1 = increased activity, struggles, vocalizations; Grade 2 = agitated, scream, vocalizations; Grade 3 = very agitated with spontaneous whole-body startle.
